# Supplementary material for: The effects of point defects on thermal-mechanical properties of BiCuOTe: a first-principles study
Source: Royal Society of Chemistry journal article supplement (doi:10.1039/d2cp05175c), 2023-01-01
Supplement: d2cp05175c1.pdf [file d2cp05175c1.pdf]

**Effects of point defects on thermal-mechanical properties of BiCuOTe: a first-principles study**

Ming Jiang<sup>1,+</sup>, Xing-Can Guo<sup>2,+</sup>, Xiao-Tao Zu<sup>3,\*</sup>, Chandra Veer Singh<sup>4,5,\*</sup>

<sup>1</sup>Institute of Physical Science and Information Technology, Anhui University, Hefei 230601, China

<sup>2</sup>School of Materials Science and Engineering, Anhui University, Hefei, 230601, China

<sup>3</sup>Yangtze Delta Region Institute (Huzhou), University of Electronic Science and Technology of China, Huzhou 313001, China

<sup>4</sup>Department of Materials Science and Engineering, University of Toronto, 184 College Street, Suite 140, Toronto, ON M5S 3E4, Canada

<sup>5</sup>Department of Mechanical and Industrial Engineering, University of Toronto, 5 King's College Road, Toronto, ON M5S 3G8, Canada

**Figure S1.** Total energy of unit-cell of BiCuOTe under different (a) cut-off energies and (b) k-point samplings.

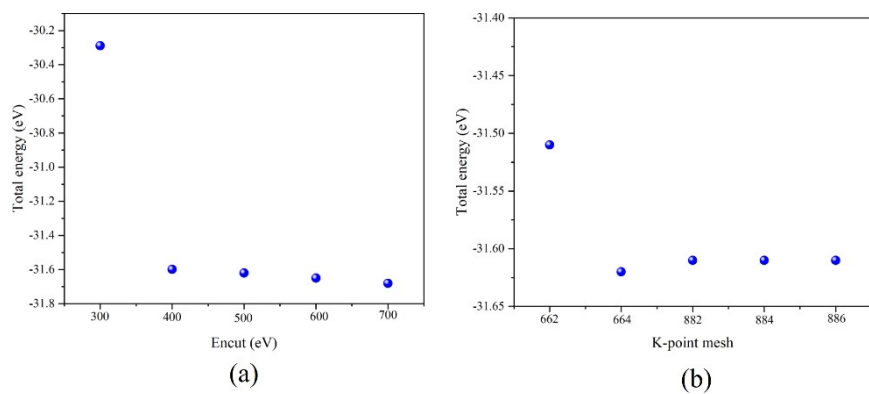

**Figure S1**

**Table S1.** The internal energy of Bi, Cu, Te and BiCuOTe obtained from DFT calculations.

|         | Total energy (eV) | Potential energy (eV/atom) |
|---------|-------------------|----------------------------|
| Bi      | -15.43            | -3.86                      |
| Cu      | -16.40            | -4.10                      |
| Te      | -9.47             | -3.16                      |
| BiCuOTe | -31.62            | -                          |

**Table S2.** The Gibbs free energy (G) of O<sub>2</sub>, H<sub>2</sub> and H<sub>2</sub>O. E: Total energy obtained from DFT calculations.  $\Delta G$ : the correction to Gibbs free energy.

|                      | Pressure (bar) | Temperature (K) | E (eV) | $\Delta G$ (eV) | G (eV) |
|----------------------|----------------|-----------------|--------|-----------------|--------|
| O <sub>2</sub> (g)   | 1              | 298.15          | -      | -               | -9.91  |
| H <sub>2</sub> (g)   | 1              | 298.15          | -6.76  | -0.045          | -6.80  |
| H <sub>2</sub> O (l) | 0.035          | 298.15          | -14.22 | -0.001          | -14.22 |
